# Supplementary material for: Acceptability and feasibility of weight management programmes for adults with severe obesity: a qualitative systematic review
Source: PubMed Central journal article supplement (PMC6738728; doi:10.1136/bmjopen-2019-029473), 2019-09-11

Motivating factors for engagement

Generally positively valued aspects of WMPs

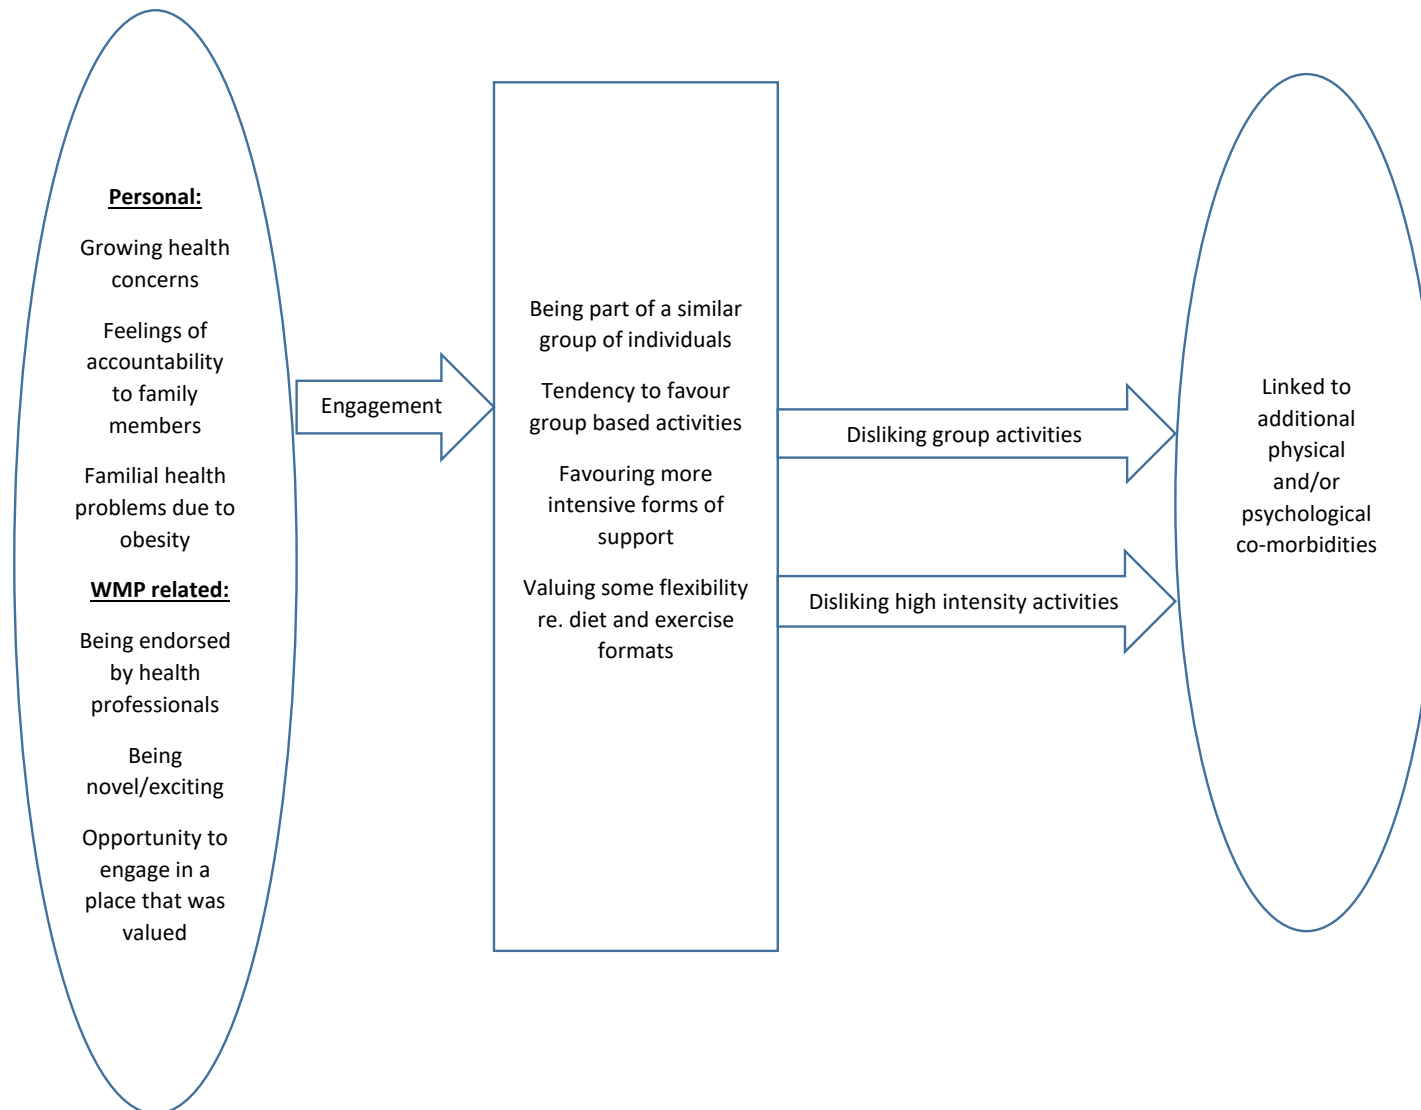

Supplement: bmjopen-2019-029473supp001.pdf [file bmjopen-2019-029473supp001.pdf]
