# Supplementary material for: Acceptability and feasibility of weight management programmes for adults with severe obesity: a qualitative systematic review
Source: PubMed Central journal article supplement (PMC6738728; doi:10.1136/bmjopen-2019-029473), 2019-09-11
Supplement: bmjopen-2019-029473supp002.pdf [file bmjopen-2019-029473supp002.pdf]

**REVIEW: Qualitative Studies****MEDLINE and EMBASE**

Ovid multifile search: <http://shibboleth.ovid.com/>

Database: Embase <1980 to 2017 Week 31>, Epub Ahead of Print, In-Process & Other Non-Indexed Citations, Ovid MEDLINE(R) Daily and Ovid MEDLINE(R) <1946 to Present>  
26th April 2017

**Date of Search 26<sup>th</sup> April 2017**

- 1 qualitative research/
- 2 exp interviews as topic/ use ppez
- 3 exp interview/ use emez
- 4 focus groups/ use ppez
- 5 grounded theory/
- 6 (qualitative or interview\$ or focus group?).tw,kw.
- 7 (ethno\$ or grounded or thematic or realist or interpretive or narrative or discourse analysis or discursive or mixed method\$).tw,kw.
- 8 or/1-7
- 9 \*obesity/
- 10 morbid obesity/ use emez
- 11 exp obesity, morbid/ use ppez
- 12 (obese or obesity).tw,kw
- 13 or/9-12
- 14 Weight Loss/ use ppez
- 15 weight reduction/ use emez
- 16 (weight adj1 (los\$ or reduc\$ or maint\$ or control\$ or manag\$)).tw,kw.
- 17 (reduc\$ adj2 (bmi or body mass index)).tw.
- 18 (reduc\$ adj2 (waist adj3 (ratio\$ or circumference))).tw.
- 19 (obesity adj1 manag\$).tw,kw
- 20 anti obesity.tw,kw
- 21 or/14-20

- 22 8 and 13 and 21
- 23 (obes\$ adj3 (morbid\$ or severe\$ or extreme\$)).tw,kw.
- 24 8 and (10 or 11 or 23)
- 25 22 or 24
- 26 25 not (abstract or letter or note or comment).pt.
- 27 remove duplicates from 26

### PsycINFO

Ovid: <http://shibboleth.ovid.com/>

Database: PsycINFO <1987 to April Week 3 2017>

### Date of Search: 26<sup>th</sup> April 2017

- 1 qualitative research/
- 2 interviews/
- 3 grounded theory/
- 4 discourse analysis/
- 5 ethnography/
- 6 (qualitative or interview\$ or focus group?).tw,kw.
- 7 (ethno\$ or grounded or thematic or realist or interpretive or narrative or discourse analysis or discursive or mixed method\$).tw,kw.
- 8 or/1-7
- 9 obesity/ or body weight/
- 10 (obese or obesity).tw,kw
- 11 9 or 10
- 12 Weight Loss/ or weight control/
- 13 (weight adj1 (los\$ or reduc\$ or maint\$ or control\$ or manag\$)).tw,kw.
- 14 (reduc\$ adj2 (bmi or body mass index)).tw.
- 15 (reduc\$ adj2 (waist adj3 (ratio\$ or circumference))).tw
- 16 anti obesity.tw,kw.
- 17 (obesity adj1 manag\$).tw,kw
- 18 or/12-17
- 19 8 and 11 and 18
- 20 (obes\$ adj3 (morbid\$ or severe\$ or extreme\$)).tw,kw.

- 21 8 and 20  
22 "obesity (attitudes toward)"/  
23 19 or 21 or 22

## CINAHL

<http://search.ebscohost.com>

1981- 25<sup>th</sup> April 2017

### Date of Search: 25<sup>th</sup> April 2017

- S1 (MH "Qualitative Studies+")  
S2 (MH "Interviews") OR (MH "Semi-Structured Interview") OR (MH "Structured Interview")  
S3 (MH "Focus Groups")  
S4 (MH "Narratives")  
S5 TX qualitative OR TX interview\* OR TX focus group\*  
S6 TX ( ethno\* or grounded or thematic ) OR TX ( realist or interpretive or narrative ) OR TX ( discourse analysis or discursive or mixed method\* )  
S7 S1 OR S2 OR S3 OR S4 OR S5 OR S6  
S8 (MH "Obesity") OR (MH "Obesity, Morbid")  
S9 (MH "Body Weight")  
S10 TX obese OR TX obesity  
S11 S8 OR S9 OR S10  
S12 (MH "Weight Control")  
S13 (MH "Weight Loss")  
S14 TX weight N1 los\* OR TX weight N1 reduc\* OR TX weight N1 maint\* OR TX weight N1 control  
S15 TX weight N1 manag\* OR TX reduc\* N2 bmi OR TX reduc\* N2 body mass  
S16 reduc\* N2 waist ratio\* OR TX reduc\* N2 waist circumference TX  
S17 S12 OR S13 OR S14 OR S15 OR S16  
S18 (S7 AND S11 AND S17)  
S19 (MH "Obesity, Morbid")  
S20 TX obes\* N3 morbid\* OR TX obes\* N3 severe OR TX obes\* N3 extreme\*  
S21 S19 OR S20

S22 S7 AND S21

S23 (MH "Attitude to Obesity")

S24 S18 OR S22 OR S23

### Science Citation Index and Social Science Citation Index

[www.webofknowledge.com](http://www.webofknowledge.com)

1980 - 28<sup>th</sup> April 2017

### Date of Search: 28<sup>th</sup> April 2017

# 1 TS=(qualitative or interview\* or focus group)

# 2 TS=(ethno\* or grounded or thematic or realist or interpretive or narrative or discourse analysis or discursive or mixed method\*).

# 3 #1 OR #2

# 4 TS=(obesity or obese)

# 5 TS=(weight NEAR/1 los\*) or TS=(weight NEAR/1 reduc\*) or TS=(weight NEAR/1 maint\*) or TS=(weight NEAR/1 control\*) or TS=(weight NEAR/1 manag\*).

# 6 TS=(reduc\* NEAR/2 BMI) OR TS=(reduc\* NEAR/2 body mass index)

# 7 TS=anti obesity

# 8 TS= (obesity NEAR/1 manag\*)

# 9 #5 or #6 or #7 or #8

10 #3 AND #4 AND #9 \*))) AND DOCUMENT TYPES: (Article)

### CAB Abstracts

Ovid search: <http://shibboleth.ovid.com/>

Database: CAB Abstracts <1984 to 2017 Week 15>

### Date of Search: 26<sup>th</sup> April 2017

1 qualitative analysis/

2 qualitative techniques/

3 (qualitative or interview\$ or focus group?).tw.

4 (ethno\$ or grounded or thematic or realist or interpretive or narrative or discourse analysis or discursive or mixed method\$).tw.

5 or/1-4

- 6 obesity/
- 7 (obese or obesity).tw.
- 8 6 or 7
- 9 weight reduction/
- 10 (weight adj1 (los\$ or reduc\$ or maint\$ or control\$ or manag\$)).tw.
- 11 (reduc\$ adj2 (bmi or body mass index)).tw.
- 12 (reduc\$ adj2 (waist adj3 (ratio\$ or circumference))).tw.
- 13 (obesity adj1 manag\$).tw
- 14 anti obesity.tw.
- 15 or/9-14
- 16 5 and 8 and 15
- 17 (obes\$ adj3 (morbid\$ or severe\$ or extreme\$)).tw.
- 18 5 and 17
- 19 16 or 18
