# Supplementary material for: Acceptability and feasibility of weight management programmes for adults with severe obesity: a qualitative systematic review
Source: PubMed Central journal article supplement (PMC6738728; doi:10.1136/bmjopen-2019-029473), 2019-09-11
Supplement: bmjopen-2019-029473supp004.pdf [file bmjopen-2019-029473supp004.pdf]

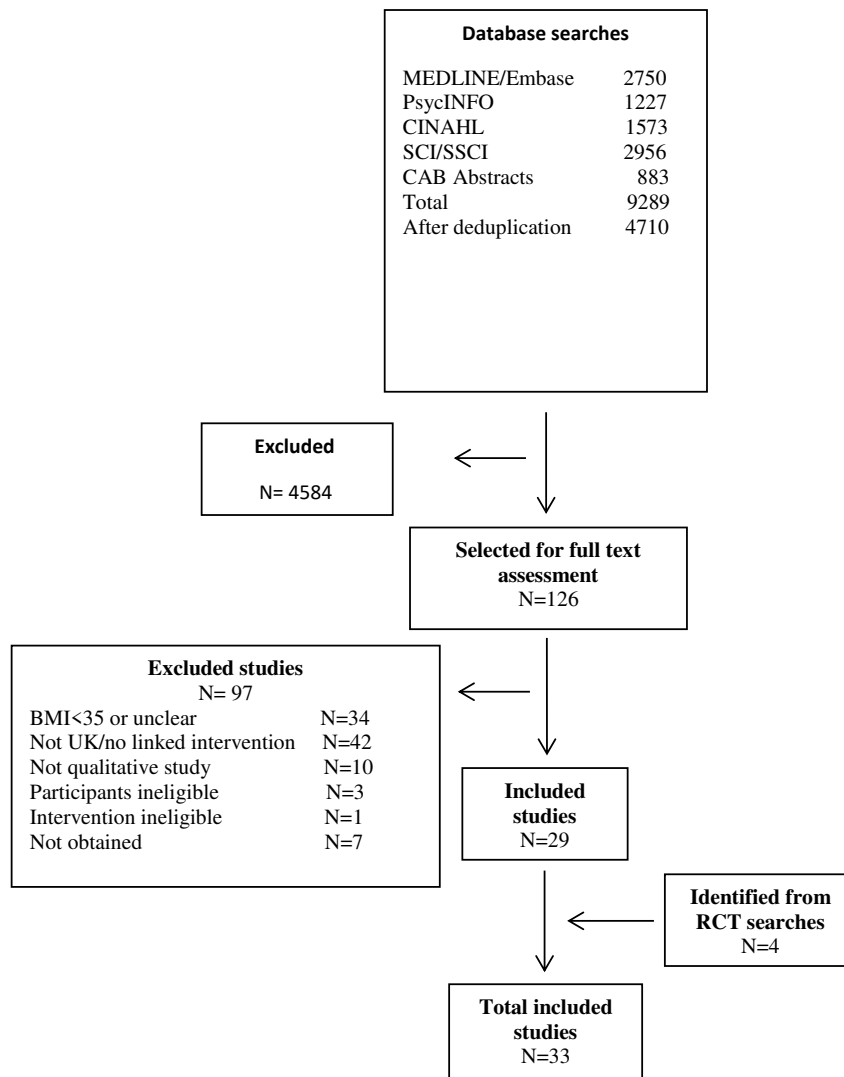

**S1 Figure** Flow chart of included studies
